# Supplementary material for: Chest electrical impedance tomography examination, data analysis, terminology, clinical use and recommendations: consensus statement of the TRanslational EIT developmeNt stuDy group
Source: PubMed Central journal article supplement — Thorax. 2016 Sep 5;72(1):83–93. doi: 10.1136/thoraxjnl-2016-208357 (PMC5329047; doi:10.1136/thoraxjnl-2016-208357), 2016-09-05
Supplement: thoraxjnl-2016-208357supp_EOS-7.pdf [file thoraxjnl-2016-208357supp_EOS-7.pdf]

**Chest electrical impedance tomography examination, data analysis,  
terminology, clinical use and recommendations: consensus statement of  
the TRanslational EIT developmeNt stuDy group**

Inéz Frerichs, Marcelo B. P. Amato, Anton H. van Kaam, David G. Tingay, Zhanqi Zhao,  
Bartłomiej Grychtol, Marc Bodenstein, Hervé Gagnon, Stephan H. Böhm, Eckhard Teschner,  
Ola Stenqvist, Tommaso Mauri, Vinicius Torsani, Luigi Camporota, Andreas Schibler, Gerhard  
K. Wolf, Diederik Gommers, Steffen Leonhardt, Andy Adler, TREND study group

**ONLINE SUPPLEMENT 7**

Clinical use of EIT in adult patients

## **Clinical use of EIT in adult patients**

### **Introduction**

This electronic online supplement (EOS) 7 provides a structured overview of clinical issues pertaining to adult patients examined by EIT in a clinical setting mainly in the fields of mechanical ventilation monitoring and pulmonary function testing as mentioned in the main document. These and other clinical issues are listed in three tables (E7.1-E7.3).

All tables have the same basic structure: they show a brief description how the EIT data specific for each issue need to be acquired and analyzed. In some cases, specific ventilation maneuvers like a positive end-expiratory pressure (PEEP) trial or constant low-flow inflation are needed to generate the information necessary for the clinical issue in question to be answered. These maneuvers are specified when applicable. The typical EIT measures generated by the individual analyses are also provided. Finally, hints on the interpretation of the findings and their use in clinical decision making are made available. The relevant references to clinical studies involving human subjects are provided in the last column of each table.

We only refer to those EIT studies here that were conducted in adult patients. We do not mention studies performed in neonatal and pediatric patients, albeit these often address clinical issues (e.g. EIT-based guidance of mechanical ventilation) relevant for the adult population as well. With this respect, we kindly ask the readers to also consult the EOS8 where the specific information on the EIT use in neonates and children is presented in detail.

The clinical EIT studies carried out in adult subjects most often involved patients suffering from various lung diseases. However, patients with other diseases not involving the respiratory system were examined as well, for instance anesthetized patients undergoing abdominal or cardiac surgery.

The study cohorts in the EIT clinical trials are generally rather small, typically about 10-20 patients. (The exact numbers of studied subjects are stated in the tables.) In addition to the patients' studies, we provide information and references to studies on healthy volunteers, especially in those cases where clinical trials on patients are lacking or when methodological concepts in EIT data acquisition, analysis and interpretation relevant for the postulated later clinical use were described in these healthy study populations. We also refer to a few pioneering animal experimental studies with clinically relevant findings.

**EIT use for monitoring lung ventilation**

The use of EIT for monitoring regional lung ventilation has been the most studied clinical EIT application so far. Its major benefit is seen in the continuous bedside assessment of regional lung aeration and ventilation in patients undergoing ventilator therapy. The primary aim of EIT use in these patients is the identification of deleterious phenomena like regional overdistension, derecruitment, cyclic alveolar collapse and EIT-guided optimization of ventilator settings minimizing or eliminating their occurrence and preventing the development of ventilator-associated lung injury. We identify several clinical issues relevant in this context and present the so far proposed and studied EIT approaches to address them in Table E7.1 presented below.

| Clinical issue                                                                            | Method of analysis / EIT measure                                                                                                                                                                                                                                       | Brief description / EIT findings                                                                                                                                                                                                                                                                                                                                            | Maneuvers / interventions besides tidal ventilation                                                                                                                                     | Normal vs. pathological results (if applicable)                                                                                                                                                                                                                                                                             | Suggested impact on clinical decisions                                                                                                                                                                                                                                            | References / assessment of evidence                                                                                                                                                                                                                                                   |
|-------------------------------------------------------------------------------------------|------------------------------------------------------------------------------------------------------------------------------------------------------------------------------------------------------------------------------------------------------------------------|-----------------------------------------------------------------------------------------------------------------------------------------------------------------------------------------------------------------------------------------------------------------------------------------------------------------------------------------------------------------------------|-----------------------------------------------------------------------------------------------------------------------------------------------------------------------------------------|-----------------------------------------------------------------------------------------------------------------------------------------------------------------------------------------------------------------------------------------------------------------------------------------------------------------------------|-----------------------------------------------------------------------------------------------------------------------------------------------------------------------------------------------------------------------------------------------------------------------------------|---------------------------------------------------------------------------------------------------------------------------------------------------------------------------------------------------------------------------------------------------------------------------------------|
| <b>Pulmonary ventilation / monitoring of ventilation / ventilator-induced lung injury</b> |                                                                                                                                                                                                                                                                        |                                                                                                                                                                                                                                                                                                                                                                             |                                                                                                                                                                                         |                                                                                                                                                                                                                                                                                                                             |                                                                                                                                                                                                                                                                                   |                                                                                                                                                                                                                                                                                       |
| <b>Lung recruitment</b>                                                                   | Regional tidal $\Delta Z$ variation (1-6) with the calculation of U/L ratio, dorsal displacement of the center of ventilation (7-10), increase in regional $C_{rs}$ in the most dependent lung region (10-12), intratidal gas distribution in dorsal lung regions (13) | After an increase in PEEP, $P_{insp}$ or low-flow inflation maneuver, lung recruitment is confirmed by the increase in regional dorsal lung ventilation assessed by different indices of regional ventilation distribution.                                                                                                                                                 | Step increments in PEEP with a fixed driving pressure until lung opening pressures are reached. Low-flow inflation maneuver. Open-lung ventilation approach. Assisted ventilation mode. | In lung pathology or with inadequate ventilator settings lung ventilation tends to decrease in dependent lung regions.                                                                                                                                                                                                      | EIT offers the potential to monitor lung recruitment and individualize opening pressures at the bedside.                                                                                                                                                                          | (2) n=16 patients<br>(3) n=20 patients<br>(4) n= 10 patients<br>(7) n=10 patients<br>(13) n=16 patients<br>(14) n=12 patients<br>(5) n=15 patients<br>(6) n=20 patients<br>(10) n=5 patients<br><br>(1) n=6 pigs<br>(8) n=6 pigs<br>(9) n=16 pigs<br>(11) n=12 pigs<br>(12) n=16 pigs |
|                                                                                           | Regional delay in ventilation / regional opening and closing pressures                                                                                                                                                                                                 | During a low-flow inflation maneuver, the delay until an increase in regional impedance above a set threshold is detected. The time delay between this time point and the actual beginning of the inflation is then calculated in each pixel or ROI. Simultaneous airway pressure measurement allows the assignment of the delay to a respective regional opening pressure. | Constant low-flow inflation (i.e. 2 l/min until 1.5 l are inflated or airway pressure of 50 mbar is reached) (15), step increase and decrease in airway pressure (16)                   | Normal: synchronous onset of regional filling, pathological: regional delay in ventilation implying recruitment, amount of delay / assignment to parallel pressure measurement indicating recruitability: long delay implies high pressure necessary to recruit, short delay increases the probability of tidal recruitment | Exclude pleural effusion or reversible bronchial occlusion as a reason for delay. Use high PEEP strategy when recruitment occurs early (open up the lung and keep it open) but do not try to open the lungs if the necessary ventilator invasiveness exceeds ARDS network limits. | (15) n=26 patients<br>(16) n=8 patients<br>(17) n=16 pigs<br>(18) n=12 pigs                                                                                                                                                                                                           |

| Clinical issue | Method of analysis / EIT measure                                                         | Brief description / EIT findings                                                                                                                                                                                                                                                                                                                                                  | Maneuvers / interventions besides tidal ventilation                            | Normal vs. pathological results (if applicable)                                        | Suggested impact on clinical decisions                                                                                                 | References / assessment of evidence                                                                                                                          |
|----------------|------------------------------------------------------------------------------------------|-----------------------------------------------------------------------------------------------------------------------------------------------------------------------------------------------------------------------------------------------------------------------------------------------------------------------------------------------------------------------------------|--------------------------------------------------------------------------------|----------------------------------------------------------------------------------------|----------------------------------------------------------------------------------------------------------------------------------------|--------------------------------------------------------------------------------------------------------------------------------------------------------------|
| 'Best' PEEP    | Decreasing or increasing or stable end-expiratory lung impedance change (EELZ)           | During an incremental and decremental PEEP trial, the EELZ trend is followed over several breaths. An increase in EELZ reflects ongoing recruitment or overdistension (PEEP too high or too low), a decrease shows derecruitment (PEEP is too low), stable EELZ implies no recruitment or derecruitment (this does not exclude unrecruited, fixed atelectasis or overdistension). | PEEP trial (incremental / decremental)                                         | Normal: steady EELZ, pathological: increasing or decreasing EELZ from breath to breath | Use PEEP with stable EELZ during a decremental PEEP trial                                                                              | (19) n=10 patients<br>(20) n=12 patients<br>(21) n=15 patients<br>(22) n=20 patients<br><br>(23) n=1 pig (lavage, surfactant)<br>(1) n=6 pigs (lavage model) |
|                | Homogeneity of ventilation (GI index)                                                    | Fall in the GI index along with increased percentage of open lung regions during inflation imply recruitability (24). GI index falls at the high compared with the low PEEP (below LIP) (25).                                                                                                                                                                                     | Constant low-flow inflation (24)<br>Variation in $V_T$ and PEEP (25)           | GI index is lower in patients with healthy lung than in patients with ARDS             | Use EIT during a constant low-flow inflation to test the lung for recruitability                                                       | (24) n=26 patients<br>(25) n=9 patients                                                                                                                      |
|                | Changes in regional $C_{rs}$ (10, 12, 14, 22, 26), the GI index (22, 27, 28) or CoV (22) | Assessment of changes in regional $C_{rs}$ or regional redistribution of ventilation (homogeneity of ventilation)                                                                                                                                                                                                                                                                 | Incremental PEEP trial or lung recruitment maneuver and decremental PEEP trial | Regional $C_{rs}$ is lower in dependent lung regions in the pathological case          | Set "optimal" PEEP at level which results in lowest GI index value in fixed ROIs or which minimizes the amount of lung collapse (<10%) | (26) n=2 patients<br>(10) n=5 patients<br>(14) n=12 patients<br>(27) n=50 patients<br>(28) n= 10 patients<br>(22) n=20 patients<br><br>(12) n=16 pigs        |

| Clinical issue                                                                 | Method of analysis / EIT measure                                                                                                                                  | Brief description / EIT findings                                                                                                                                                                | Maneuvers / interventions besides tidal ventilation                                | Normal vs. pathological results (if applicable)                                                                                                                                 | Suggested impact on clinical decisions                                                                                                                            | References / assessment of evidence                                                                |
|--------------------------------------------------------------------------------|-------------------------------------------------------------------------------------------------------------------------------------------------------------------|-------------------------------------------------------------------------------------------------------------------------------------------------------------------------------------------------|------------------------------------------------------------------------------------|---------------------------------------------------------------------------------------------------------------------------------------------------------------------------------|-------------------------------------------------------------------------------------------------------------------------------------------------------------------|----------------------------------------------------------------------------------------------------|
| <b>Atelectasis / lung collapse / derecruitment</b>                             | Changes in regional $C_{rs}$ in dorsal lung regions. Increase in the U/L ventilation ratio or ventral displacement of the center of ventilation.                  | Assessment of changes in $C_{rs}$ in response to a PEEP step expressed as a percent change in regional (pixel) $C_{rs}$ in relation to the best $C_{rs}$ reached during a PEEP titration trial. | Decremental PEEP trial. Step changes in PEEP, inspiratory pressure or tidal volume | Normal: more homogeneous distribution of ventilation between ventral and dorsal regions of the lung. Pathologic: decreased relative regional ventilation in dorsal lung regions | Helps to identify lung-protective ventilator settings resulting in minimum lung collapse and overdistension.                                                      | (26) n=2 patients<br>(4) n=10 patients<br>(29) n=14 patients<br><br>(12) n=16 pigs<br>(8) n=6 pigs |
|                                                                                | Distribution of tidal EIT variation between dependent and non-dependent regions (U/L ventilation ratio)                                                           | Increase in U/L ventilation ratio after suctioning implies derecruitment                                                                                                                        | Open suctioning                                                                    | Patients with a fall in functional residual capacity after suctioning exhibit an increase in U/L ventilation ratio                                                              | Stable U/L ratio after suctioning implies that patients do not require a recruitment maneuver                                                                     | (30) n= 59 patients                                                                                |
|                                                                                | CoV                                                                                                                                                               | CoV shifts towards non-dependent lung regions after the induction of:<br>- general anaesthesia during PSV, PCV and VCV<br>- and pneumoperitoneum                                                | Mechanical ventilation with laryngeal mask or endotracheal tube                    | Spontaneous breathing and PEEP preserve the preoperative ventilation distribution during general anaesthesia                                                                    | n.a.                                                                                                                                                              | (7) n=10 patients<br>(31) n=30 patients<br>(32) n=32 patients                                      |
| <b>Homo-geneity or hetero-geneity of regional respiratory system mechanics</b> | Determination of inhomogeneous respiratory system mechanics, calculation of EIT-derived measures like the GI index, center of ventilation, U/L ventilation ratio. | The inhomogeneity of regional ventilation can be characterized by several gross EIT measures or by indices describing the ventilation distribution in the anteroposterior direction.            | PEEP trial, ongoing tidal ventilation                                              | Normal: homogeneous respiratory system mechanics                                                                                                                                | Inhomogeneity may lead to an adjustment of ventilator settings until homogeneity is reached. Severe un-correctable inhomogeneity may lead to rescue ECMO therapy. | (27) n=50 patients<br>(28) n=10 patients<br>(33) n=2 patients                                      |

| Clinical issue                                                  | Method of analysis / EIT measure                                                                                                          | Brief description / EIT findings                                                                                                                                                                                | Maneuvers / interventions besides tidal ventilation                                                                                                                                                                           | Normal vs. pathological results (if applicable)         | Suggested impact on clinical decisions                                                                                       | References / assessment of evidence                                                                                                               |
|-----------------------------------------------------------------|-------------------------------------------------------------------------------------------------------------------------------------------|-----------------------------------------------------------------------------------------------------------------------------------------------------------------------------------------------------------------|-------------------------------------------------------------------------------------------------------------------------------------------------------------------------------------------------------------------------------|---------------------------------------------------------|------------------------------------------------------------------------------------------------------------------------------|---------------------------------------------------------------------------------------------------------------------------------------------------|
|                                                                 | Spatial and temporal heterogeneity of ventilation during pulmonary function testing measured by EIT                                       | Regional IVC, FEV <sub>1</sub> , FVC, FEV <sub>1</sub> /FVC and expiration times needed to exhale set percentages of FVC. The heterogeneity of their spatial distribution characterized by the CV or GI indices | Full inspiration to TLC and forced full expiration to RV                                                                                                                                                                      | Pathological: higher spatial and temporal heterogeneity | n.a.                                                                                                                         | (34) n=33 patients and n=26 healthy human subjects<br>(35) n=7 patients and n= 7 healthy subjects<br>(36) n=14 patients and n=14 healthy subjects |
|                                                                 | Assessment of homogeneity/heterogeneity of ventilation distribution (PSV and NAVA: (37), HFOV: (38-41), CMV (42)) by various EIT measures | Regional distribution/changes in ventilation or lung volume in set regions of interest during various modes of mechanical ventilation.                                                                          | Measurement during CMV, HFOV, PSV, NAVA                                                                                                                                                                                       | n.a.                                                    | Set mechanical ventilation settings to ensure homogeneous distribution of ventilation/lung volume in set regions of interest | (37) n=10 patients<br>(39) n=10 patients<br>(40) n=1 patient<br>(42) n=10 patients<br><br>(38) n=9 pigs<br>(41) n=18 pigs                         |
| <b>Regional compliance / regional impedance-pressure curves</b> | Estimation of regional $\Delta Z/\Delta P$ (26) or fractional V <sub>T</sub> /ΔP (10, 12); construction of regional ΔZ-P curves (43-45)   | Assumption of uniform pressure distribution in the ventilated lung.                                                                                                                                             | C <sub>rs</sub> : step changes in PEEP under constant ventilator settings. Regional ΔZ-P curves or fractional V <sub>T</sub> : constant low-flow lung inflation (and deflation). Step increases/decreases in airway pressure. | Normal: homogenous $\Delta Z/\Delta P$                  | Optimal PEEP selection. Detection of regional lung recruitment, overdistension and collapse.                                 | (26) n=2 patients<br>(44) n=9 patients<br><br>(10) n=10 pigs<br>(12, 43) n=16 pigs<br>(45) n=9 pigs<br>(46) n=12 pigs                             |

| Clinical issue                                          | Method of analysis / EIT measure                                                                                    | Brief description / EIT findings                                                                                                                                               | Maneuvers / interventions besides tidal ventilation                                                   | Normal vs. pathological results (if applicable) | Suggested impact on clinical decisions                                                | References / assessment of evidence                 |
|---------------------------------------------------------|---------------------------------------------------------------------------------------------------------------------|--------------------------------------------------------------------------------------------------------------------------------------------------------------------------------|-------------------------------------------------------------------------------------------------------|-------------------------------------------------|---------------------------------------------------------------------------------------|-----------------------------------------------------|
| <b>Effect of high frequency oscillatory ventilation</b> | Homogenization of lung volume distribution during HFOV, assessment of regional lung volume distribution during HFOV | After calibration of tidal impedance to tidal air volume.                                                                                                                      | calibration                                                                                           | Normal: homogeneous lung volume distribution    | Change of CDP and oscillation frequency                                               | (39) n=10 patients<br>(38) n=8 pigs (lavage injury) |
| <b>Effect of sighs</b>                                  | Distribution of $\Delta$ EELZ and tidal $\Delta$ Z variation                                                        | Sigh increases EELZ and decreases ventilation heterogeneity                                                                                                                    | Sigh: 35 cm H <sub>2</sub> O for 3-4 s applied at different rates                                     | Normal: homogeneous lung volume distribution    | Sighs reduce strain and ventilation heterogeneity during assisted ventilation in ARDS | (47) n=20 patients                                  |
| <b>Over-distension</b>                                  | Regional pressure-volume ( $\Delta$ Z) curves                                                                       | Determination of regional UIP by an automatic algorithm.                                                                                                                       | parallel measurement of airway pressure, better: transpulmonary pressure; low-flow inflation maneuver | Normal: homogenous UIP                          | Reduction of mean airway pressure                                                     | (44) n=9 patients                                   |
|                                                         | Deterioration of ventilation in lung units                                                                          | Decrease in pixel C <sub>rs</sub> as surrogate for amount of alveolar collapse within that pixel. Weighted average at each PEEP step gives an estimate of cumulative collapse. | Lung recruitment maneuver and decremental PEEP trial                                                  | n.a.                                            | Set PEEP at level with lowest cumulated collapse                                      | (26) n=2 patients                                   |



| <b>Clinical issue</b>                         | <b>Method of analysis / EIT measure</b>                                                                                                                                                              | <b>Brief description / EIT findings</b>                                                                                                                                                                                                                         | <b>Maneuvers / interventions besides tidal ventilation</b>                                 | <b>Normal vs. pathological results (if applicable)</b>                                                                                                                                                                              | <b>Suggested impact on clinical decisions</b>                                                                                | <b>References / assessment of evidence</b>                                                                                        |
|-----------------------------------------------|------------------------------------------------------------------------------------------------------------------------------------------------------------------------------------------------------|-----------------------------------------------------------------------------------------------------------------------------------------------------------------------------------------------------------------------------------------------------------------|--------------------------------------------------------------------------------------------|-------------------------------------------------------------------------------------------------------------------------------------------------------------------------------------------------------------------------------------|------------------------------------------------------------------------------------------------------------------------------|-----------------------------------------------------------------------------------------------------------------------------------|
| <b>Regional gas flow</b>                      | Determination of regional pulmonary gas flow                                                                                                                                                         | First derivative of regional $\Delta Z(t)$ is proportional to regional flow. $V(t)$ can be imaged after calibration of $\Delta Z(t)$                                                                                                                            | Measurement during tidal ventilation or during forced full expiration/recruitment maneuver | Normal: homogenous distribution of regional gas flow                                                                                                                                                                                | None at the moment                                                                                                           | (36) n=14 patients and n=14 healthy adults<br>(35) n=7 patients and n=7 healthy adults<br>(48) n=5 patients<br><br>(49) n=13 pigs |
| <b>EIT-guided lung-protective ventilation</b> | Use of EIT ventilation indices to reduce heterogeneity of ventilation distribution or optimize regional $C_{rs}$ (11, 50), EIT determined center of ventilation calculated in a Fuzzy controller (8) | Regional EIT-derived $C_{rs}$ used to maximize recruitment of the dependent and minimize overdistention of the nondependent lung areas. EIT proposed in automated (closed-loop) ventilation algorithms to determine the necessity of lung recruitment maneuvers | Incremental PEEP titration                                                                 | Not applicable                                                                                                                                                                                                                      | Use EIT-derived $C_{rs}$ to set PEEP at the level which balances dependent lung recruitment and nondependent overdistention. | (11) n=12 pigs<br>(50) n=4 pigs<br>(8) n=6 pigs                                                                                   |
| <b>Single-lung ventilation</b>                | Monitoring qualitatively or quantitatively left and right-sided ventilation                                                                                                                          | During tidal artificial ventilation, a ROI-based analysis is performed either in a fEIT ventilation tomogram or in the EIT right and left lung waveforms. A loss or gain in ventilation during manipulation of the endotracheal tube shows either SLV or DLV.   | Measurement during tidal artificial ventilation                                            | SLV should be avoided during standard situations of ventilations (it can occur due to too deep intubation). But SLV can also be desired (during lung/thorax surgery, ventilation in a patient with a large bronchopleural fistula). | Correct tube position either to induce SLV or DLV whatever is intended                                                       | (51) n=10 patients<br>(52) n=40 patients<br><br>(53) n=5 pigs                                                                     |

| Clinical issue                                 | Method of analysis / EIT measure                                                                                 | Brief description / EIT findings                                                                                                                                                                                                             | Maneuvers / interventions besides tidal ventilation                                                    | Normal vs. pathological results (if applicable)                               | Suggested impact on clinical decisions                          | References / assessment of evidence                 |
|------------------------------------------------|------------------------------------------------------------------------------------------------------------------|----------------------------------------------------------------------------------------------------------------------------------------------------------------------------------------------------------------------------------------------|--------------------------------------------------------------------------------------------------------|-------------------------------------------------------------------------------|-----------------------------------------------------------------|-----------------------------------------------------|
| Monitoring of tidal recruitment of atelectasis | Monitoring: regional determination of tidal recruitment (54-56)                                                  | Proof of tidal recruitment is given by fast non-invasive measurement of SpO <sub>2</sub> oscillations, changes in regional V <sub>T</sub> , EELZ and gas flow are followed by EIT in different ROIs                                          | Parallel measurement of intratidal changes of gas exchange by fast, non-invasive SpO <sub>2</sub> (54) | Normal: no regional recruitment of atelectasis                                | Lung recruitment, increase of PEEP, reduction of VT             | (56)n=9 patients<br>(54) n=21 pigs<br>(55) n=9 pigs |
|                                                | Detecting a potential for tidal recruitment: Ventilation delay in the dorsal regions of the lung (17, 18)        | During a low-flow inflation the delay until a threshold increase of regional Z in dorsal lung regions is reached (in comparison with global or ventral regions) indicates the late "opening" of lung units that collapsed during expiration. | Low-flow inflation maneuver                                                                            | Normal: no regional recruitment of atelectasis                                | Lung recruitment, increase in PEEP, reduction of V <sub>T</sub> | (17) n=16 pigs<br>(18) n=12 pigs                    |
|                                                | Detection of tidal recruitment by increased C <sub>rs</sub> in dependent regions on V <sub>T</sub> increase (10) | Higher C <sub>rs</sub> at higher V <sub>T</sub> at identical PEEP implies tidal recruitment                                                                                                                                                  | Temporary increase in V <sub>T</sub>                                                                   | Regional C <sub>rs</sub> remains stable when tidal recruitment is not present | Lung recruitment, increase in PEEP                              | (10) n=5 patients and 10 pigs                       |

**Table E7.1.** Clinical issues of EIT use in adult patients focussing on monitoring lung ventilation and guidance of mechanical ventilation.

CDP: continuous distending pressure; CoV: center of ventilation; CMV: controlled mechanical ventilation; CoV: center of ventilation; C<sub>rs</sub>: respiratory system compliance; CV: coefficient of variation; DLV: double-lung ventilation; EELZ: end-expiratory lung impedance; ΔEELZ: end-expiratory lung impedance change; fEIT: functional EIT; FEV<sub>1</sub>: forced expiratory volume in one second; FVC: forced expiratory vital capacity; GI: global inhomogeneity, HFOV: high-frequency oscillatory ventilation; IVC: inspiratory vital capacity; n.a.: not applicable; LIP: lower inflection point of a pressure-volume curve; NAVA: neutrally adjusted ventilation assist; P: pressure; P<sub>insp</sub>: inspiratory pressure; ΔP: pressure change; PEEP: positive end-expiratory pressure, PCV: pressure-controlled ventilation; PSV: pressure-support ventilation; ROI: region of interest; RV: residual volume; SLV: single-lung ventilation; SpO<sub>2</sub>: oxygen saturation; TLC: total lung capacity; UIP: upper inflection point of a pressure-volume curve; U/L: upper-to-lower ventilation ratio; VCV: volume-controlled ventilation; V<sub>T</sub>: tidal volume; Z: impedance; ΔZ: impedance change

## **EIT use for monitoring cardiac activity, lung perfusion and fluid status**

It has long been realized that the physiological activity of the heart leads to periodic changes in regional thoracic electrical bioimpedance that can be traced by EIT (57, 58). This information can be used to study for instance the heart performance, by measuring the stroke volume, or lung perfusion. Compared with the ventilation-oriented chest EIT, the cardiovascular aspects of EIT use have been studied less often and the number of involved research groups is lower. The explanation may be that the analysis of EIT data specifically aiming at cardiovascular phenomena in the chest is challenging because of the small amplitude of the corresponding heart-beat related signal variations.

Table E7.2 summarizes the efforts in EIT research focussing on such clinical issues as the assessment of stroke volume, ventricular diastolic performance, pulmonary perfusion, pulmonary hypertension, ventilation-perfusion matching and heart-lung interactions. The table also contains information on a few studies targeting the measurement of the fluid content of the lung tissue using EIT. The clinical issues comprise the diagnosis and monitoring of lung edema development and its therapy and the related assessment of extravascular lung water.

| Clinical issue                             | Method of analysis / EIT measure                                                                                                                                                                                  | Brief description / EIT findings                                                                                                                                                                                                                                                                                                                                                                                                                                                                                    | Maneuvers / interventions besides tidal ventilation                                                                                                                                                                                                                                                   | Normal vs. pathological results (if applicable)                                                                                                                          | Suggested impact on clinical decisions                             | References / assessment of evidence                                                                                                                                                                                                                          |
|--------------------------------------------|-------------------------------------------------------------------------------------------------------------------------------------------------------------------------------------------------------------------|---------------------------------------------------------------------------------------------------------------------------------------------------------------------------------------------------------------------------------------------------------------------------------------------------------------------------------------------------------------------------------------------------------------------------------------------------------------------------------------------------------------------|-------------------------------------------------------------------------------------------------------------------------------------------------------------------------------------------------------------------------------------------------------------------------------------------------------|--------------------------------------------------------------------------------------------------------------------------------------------------------------------------|--------------------------------------------------------------------|--------------------------------------------------------------------------------------------------------------------------------------------------------------------------------------------------------------------------------------------------------------|
| <b>Pulmonary perfusion and fluid state</b> |                                                                                                                                                                                                                   |                                                                                                                                                                                                                                                                                                                                                                                                                                                                                                                     |                                                                                                                                                                                                                                                                                                       |                                                                                                                                                                          |                                                                    |                                                                                                                                                                                                                                                              |
| <b>Pulmonary perfusion</b>                 | EIT lung pulsatility (59-61) or regional relative distribution of RPBF by hypertonic saline first-pass kinetics (62, 63) or indirect assessment of RPBF by EIT measurement of regional O <sub>2</sub> uptake (64) | Cardiac-related impedance changes can be detected by EIT by ECG-triggered measurement, measurement during apnea or frequency-domain filtering. The signal is not directly related to stroke volume but more to vessel pulsations. Pulsatility: detects cardiac-related impedance changes related to changes in local blood volume. RPBF: The high conductivity of hypertonic saline makes it suitable for an electric contrast agent. Injected in the right atrium a first-pass kinetics analysis can be performed. | Administration of saline bolus, ECG triggered EIT data sampling, frequency domain filtering. Pulsatility: Frequency domain filtering and/or ECG-gated EIT acquisition. During apnea or tidal ventilation, RPBF distribution: Administration of a small saline bolus into a central vein during apnea. | Normal: homogenous distribution of heart-beat related signal. No interference with inspiration or expiration. Pathology (pulmonary embolism): regional perfusion deficit | None at the moment                                                 | (60) n=10 patients<br>(61) n=10 healthy subjects and 20 patients<br>(65) n=8 human subjects (ECG trigger)<br>(64) n=12 patients<br><br>(59) n=8 pigs (apnea)<br>(62) n=3 pigs (saline bolus)<br>(63) n=6 pigs (saline bolus)<br>(53) n=5 pigs (saline bolus) |
| <b>Pulmonary hyper-tension</b>             | EIT pulsatility amplitude: Maximal impedance change during systole ( $\Delta Z_{sys}$ )                                                                                                                           | Changes in EIT pulsatility amplitude can be related to the interaction between cardiac-related changes in vascular volume and local vascular mechanics.                                                                                                                                                                                                                                                                                                                                                             | Measurement during spontaneous breathing or mechanical ventilation                                                                                                                                                                                                                                    | Patients with IPAH have a reduced volume pulse of the pulmonary vascular bed manifested as a reduced systolic impedance amplitude                                        | Diagnosis screening of IPAH. Evaluation of responses to treatment. | (66) n=21 patients and n=30 healthy human subjects<br>(67) n=8 patients                                                                                                                                                                                      |

| <b>Clinical issue</b>                       | <b>Method of analysis / EIT measure</b>                                                   | <b>Brief description / EIT findings</b>                                       | <b>Maneuvers / interventions besides tidal ventilation</b>               | <b>Normal vs. pathological results (if applicable)</b>              | <b>Suggested impact on clinical decisions</b> | <b>References / assessment of evidence</b>                                                                                                                  |
|---------------------------------------------|-------------------------------------------------------------------------------------------|-------------------------------------------------------------------------------|--------------------------------------------------------------------------|---------------------------------------------------------------------|-----------------------------------------------|-------------------------------------------------------------------------------------------------------------------------------------------------------------|
| <b>Ventilation-perfusion mismatch</b>       | EIT regional ventilation and pulsatility estimated perfusion                              | Regional mapping of ventilation and perfusion and ventilation-perfusion ratio | Analysis of functional ventilation and perfusion maps                    | Normal: matched ventilation and perfusion                           | None at the moment                            | (68) n=12 healthy subjects<br><br>(69) n=11 pigs<br>(70) n=6 pigs                                                                                           |
| <b>Cardiac output</b>                       | Cyclic variation in Z in the cardiac (ventricular) region, HR derived from the EIT signal | Cyclic variation in Z correlates with SV                                      | No specific interventions (variation in SV in validation studies)        | n.a.                                                                | None at the moment                            | (57) n=4 healthy subjects<br>(71) n=10 healthy subjects<br>(72) n=10 healthy subjects<br>(73) n=26 patients and n=10 healthy subjects<br><br>(74) n=14 pigs |
| <b>Right ventricular diastolic function</b> | ROI-based analysis of the diastolic part of the heart-beat related EIT waveform           | EIT-derived RAEV correlates with MRI findings                                 | No specific interventions                                                |                                                                     |                                               | (75) n=27 patients and n=7 healthy subjects                                                                                                                 |
| <b>Heart-lung interaction</b>               | EIT assessment of pulmonary stroke volume variation                                       | $\Delta Z$ pulse arrival time                                                 | Mechanical ventilation at different $V_T$ and PEEP settings, hypovolemia | Ventilation induces stroke volume variation that is detected by EIT | n.a.                                          | (76) n=8 pigs                                                                                                                                               |

| Clinical issue                                | Method of analysis / EIT measure                                                                                                                                                                                                                               | Brief description / EIT findings                                                                                                                                                                                                                                                    | Maneuvers / interventions besides tidal ventilation                                                                                                                            | Normal vs. pathological results (if applicable)                                                                                                                                                                      | Suggested impact on clinical decisions                                                                                                                                                                                                                             | References / assessment of evidence                                                                                                                                                             |
|-----------------------------------------------|----------------------------------------------------------------------------------------------------------------------------------------------------------------------------------------------------------------------------------------------------------------|-------------------------------------------------------------------------------------------------------------------------------------------------------------------------------------------------------------------------------------------------------------------------------------|--------------------------------------------------------------------------------------------------------------------------------------------------------------------------------|----------------------------------------------------------------------------------------------------------------------------------------------------------------------------------------------------------------------|--------------------------------------------------------------------------------------------------------------------------------------------------------------------------------------------------------------------------------------------------------------------|-------------------------------------------------------------------------------------------------------------------------------------------------------------------------------------------------|
| <b>Lung edema / extra-vascular lung water</b> | Estimation of extravascular lung water by U/L ventilation ratio (77), reduction in $\Delta$ EELZ (78), mean Z (79, 80) or $\Delta$ Z during full inspiration (81), fdEIT (82) or aEIT imaging (83), EIT lung water ratio computed from the IM coefficient (84) | EVLW decreases bio-impedance. Increased EVLW can be detected by analysis of ventilation-induced impedance changes in the anterior and posterior parts of the lung (U/L ventilation ratio) or decreased $\Delta$ EELZ or reversed slope of IM coefficient during lateral positioning | Normal mechanical ventilation.<br>Calculation of U/L ratio. Fluid administration.<br>Right and left tilt and calculation of imbalance between right and left lung ventilation. | An U/L of 0.64 has a 93% sensitivity and 87% specificity to detect a supranormal EVLW (77). IM coefficients exhibit a negative trend slope in normal lungs during body rotation and a positive one in injured lungs. | Diagnosis of lung edema. Aid in clinical decision making regarding fluid/diuretic therapy. Diagnosis high-altitude pulmonary edema. (Changes in pulmonary fluid content may impact the EIT-derived information on lung aeration and should be taken into account.) | (77) n=14 patients<br>(79) n=9 healthy subjects<br>(80) n=20 patients<br>(83) n=4 patients<br>(81) n=20 healthy subjects<br>(78) n=14 pigs<br>(82) n=3 goats<br>(83) n=5 pigs<br>(84) n=30 pigs |

**Table E7.2.** Clinical issues of EIT use in adult patients focussing on heart activity, lung perfusion and fluid status.

aEIT: absolute EIT imaging; EVLW: extravascular lung water; EELZ: end-expiratory lung impedance;  $\Delta$ EELZ: end-expiratory lung impedance change; fdEIT: frequency-difference EIT imaging; HR: heart rate; IM: imbalance ventilation coefficient; IPAH: idiopathic pulmonary hypertension; n.a.: not applicable; PEEP: positive end-expiratory pressure, RAEV: right atrium emptying volume; RPBPF: regional pulmonary blood flow; SV: stroke volume; U/L: upper-to-lower ventilation ratio;  $V_T$ : tidal volume; Z: impedance;  $\Delta$ Z: impedance change;  $\Delta$ Z<sub>sys</sub>: maximum impedance change during systole

## **EIT examinations in specific lung disease**

The most widespread clinical use of EIT is noted in critically ill, mechanically ventilated patients. The most frequent lung disease that is assessed and monitored by EIT in these patients is ARDS. Nonetheless, there exist several other pulmonary diseases where EIT has been applied and where the potential for routine clinical use has been identified. These comprise diseases like pneumothorax and pleural effusion that can also be encountered in mechanically ventilated patients but also other diseases where EIT examinations take place during spontaneous breathing. The number of studies focussing on chronic lung diseases like COPD, asthma and cystic fibrosis is increasing, the results imply that EIT might be of benefit, e.g. in disease staging or monitoring of disease progression and therapy effects. EIT has also been applied in patients suffering from pneumonia or lung cancer. A few case reports on EIT examinations in less common diseases, like tracheobronchomalacia and lung transplant, have been reported as well. Table E7.3 gives the detailed information on EIT use in these specific lung diseases.

| <b>Clinical issue</b>            | <b>Method of analysis / EIT measure</b>                                                   | <b>Brief description / EIT findings</b>                                                                                                            | <b>Maneuvers / interventions besides tidal ventilation</b>                 | <b>Normal vs. pathological results (if applicable)</b>                                          | <b>Suggested impact on clinical decisions</b>                                                                           | <b>References / assessment of evidence</b>                                        |
|----------------------------------|-------------------------------------------------------------------------------------------|----------------------------------------------------------------------------------------------------------------------------------------------------|----------------------------------------------------------------------------|-------------------------------------------------------------------------------------------------|-------------------------------------------------------------------------------------------------------------------------|-----------------------------------------------------------------------------------|
| <b>Specific diagnoses</b>        |                                                                                           |                                                                                                                                                    |                                                                            |                                                                                                 |                                                                                                                         |                                                                                   |
| <b>Pleural effusion/ empyema</b> | Ventilation distribution, $\Delta$ EELZ, ventilation asynchrony                           | R/L lung ventilation asymmetry in unilateral affections, changes in ventilation distribution                                                       | Measurement during spontaneous breathing or mechanical ventilation         | Ventilation reduced at the affected side of the chest in predominantly unilateral pathology     | The improved symmetry of right-to-left lung ventilation distribution can be assessed during aspiration of pleural fluid | (85) n=6 patients<br>(86) n= 10 patients<br>(87) n=22 patients                    |
| <b>Pneumothorax</b>              | Ventilation distribution, $\Delta$ EELZ automated algorithm for detection of pneumothorax | Online sequential analysis of perturbations seen in the EIT ventilation and aeration change maps constructed from two to three respiratory cycles. | Sequential increase in PEEP with a fixed inspiratory driving pressure (88) | Pneumothoraces as small as 20 mL could be detected with EIT (sensitivity 100%; specificity 95%) | EIT-based algorithm can be used to detect early signs and locations of pneumothoraces in high-risk situations           | (88) n=39 pigs<br>(89) n=1 pig                                                    |
| <b>Pneumonia</b>                 | Ventilation distribution                                                                  | R/L lung ventilation asymmetry in unilateral disease                                                                                               | Measurement during spontaneous breathing or mechanical ventilation         | Ventilation reduced at the affected side of the chest                                           | None at the moment                                                                                                      | (90) n=1 patient<br>(91) n=24 patients                                            |
| <b>Lung cancer</b>               | Ventilation distribution                                                                  | R/L lung ventilation asymmetry in unilateral bronchial carcinoma                                                                                   | Measurement during spontaneous breathing or mechanical ventilation         | Ventilation reduced at the affected side of the chest                                           | None at the moment                                                                                                      | (90) n=1 patient<br>(92) n=5 patients<br>(93) n=21 patients<br>(94) n=14 patients |



| <b>Clinical issue</b> | <b>Method of analysis / EIT measure</b>                                                                                                                                                                                       | <b>Brief description / EIT findings</b>                                                                                                      | <b>Maneuvers / interventions besides tidal ventilation</b>                                                                | <b>Normal vs. pathological results (if applicable)</b>                                                     | <b>Suggested impact on clinical decisions</b>                                                                                         | <b>References / assessment of evidence</b>                                                                                                                                          |
|-----------------------|-------------------------------------------------------------------------------------------------------------------------------------------------------------------------------------------------------------------------------|----------------------------------------------------------------------------------------------------------------------------------------------|---------------------------------------------------------------------------------------------------------------------------|------------------------------------------------------------------------------------------------------------|---------------------------------------------------------------------------------------------------------------------------------------|-------------------------------------------------------------------------------------------------------------------------------------------------------------------------------------|
| <b>COPD</b>           | Spatial and temporal ventilation homogeneity (quantified by various EIT measures representing regional lung volumes (e.g. $V_T$ , FEV <sub>1</sub> , FVC), flow rates (e.g. PEF, FEF <sub>25-75</sub> ) or expiration times)  | Ventilation distribution is heterogeneous in COPD, regional responses to bronchodilator administration can be traced by EIT                  | Measurement during spontaneous breathing (34, 95-97), forced full expiration (34, 97) and mechanical ventilation (39, 98) | Ventilation heterogeneity more pronounced in COPD patients compared with healthy subjects                  | Regional pulmonary function monitoring, identification of exacerbation and response to therapy and reversibility testing, phenotyping | (34) n=33 patients and n=26 healthy subjects<br>(95) n=12 patients and n=15 healthy subjects<br>(96) n=28 patients<br>(39) n=10 patients<br>(97) n= 35 patients<br>(98) n=1 patient |
| <b>Asthma</b>         | Spatial and temporal ventilation homogeneity (quantified by various EIT measures representing regional lung volumes (e.g. $V_T$ , FEV <sub>1</sub> , FVC), expiratory flows (PEF, FEF <sub>25-75</sub> ) or expiration times) | Ventilation distribution is heterogeneous in patients with chronic history of asthma, it improves after bronchodilator reversibility testing | Measurement during spontaneous breathing and forced full expiration                                                       | Ventilation heterogeneity is more pronounced in asthma patients compared with age-matched healthy subjects | Regional pulmonary function monitoring, identification of exacerbation and response to therapy and reversibility testing              | (35) n=7 patients and n=7 healthy subjects                                                                                                                                          |

| Clinical issue                 | Method of analysis / EIT measure                                                                                                                                                                                                        | Brief description / EIT findings                                                                                                                                  | Maneuvers / interventions besides tidal ventilation                                  | Normal vs. pathological results (if applicable)                                                                                                                                                                                                                                                                 | Suggested impact on clinical decisions                                                                           | References / assessment of evidence                                                         |
|--------------------------------|-----------------------------------------------------------------------------------------------------------------------------------------------------------------------------------------------------------------------------------------|-------------------------------------------------------------------------------------------------------------------------------------------------------------------|--------------------------------------------------------------------------------------|-----------------------------------------------------------------------------------------------------------------------------------------------------------------------------------------------------------------------------------------------------------------------------------------------------------------|------------------------------------------------------------------------------------------------------------------|---------------------------------------------------------------------------------------------|
| <b>Cystic fibrosis</b>         | Spatial distribution of EIT-derived maximum expiratory flows ratio $MEF_{25}/MEF_{75}$ , GI indices of inhaled volumes at 25%, 50%, 75% and 100% of IVC (36)<br>Fraction of ventilation and filling index in the right lung region (99) | Pixel $MEF_{25}/MEF_{75}$ are heterogeneously distributed, GI indices of inhaled volumes fall significantly in the course of full inspiration in patients with CF | Forced full inspiration and expiration (36), lateral posture and breathing aids (99) | Normal: Narrow distribution peaks of $MEF_{25}/MEF_{75}$ , stable GI during deep inspiration<br>Pathological: Broad $MEF_{25}/MEF_{75}$ distribution, high GI indices at low inhaled volumes<br>Temporal ventilation distribution is affected by breathing aids in healthy subjects but not in patients with CF | Regional pulmonary function monitoring, identification of exacerbation and response to drug and physical therapy | (36) n=14 patients and n=14 healthy subjects<br>(99) n=9 patients and n=11 healthy subjects |
| <b>Tracheo-broncho-malacia</b> | Percentage of collapse and overdistension during PEEP titration (100), R/L ventilation distribution (101)                                                                                                                               | EIT identified the PEEP level where airway collapse was prevented                                                                                                 | Decremental PEEP trial                                                               | n.a.                                                                                                                                                                                                                                                                                                            | Adjustment of ventilator settings                                                                                | (100) n=1 patient<br>(101) n=1 patient                                                      |
| <b>Lung transplant</b>         | Ventilation distribution                                                                                                                                                                                                                | Dissimilar functional status of the native and the transplanted lungs                                                                                             | Spontaneous breathing or mechanical ventilation                                      | Symmetric ventilation distribution in healthy subjects                                                                                                                                                                                                                                                          | Adjustment of ventilator settings depending on the R/L ventilation distribution                                  | (102) n=1 patient                                                                           |

**Table E7.3.** EIT use in adult patients with specific pulmonary diagnoses.

CF: cystic fibrosis;  $\Delta EELZ$ : change in end-expiratory lung impedance;  $FEF_{25-75}$ : mean forced expiratory flow between 25% and 75% of FVC;  $FEV_1$ : forced expiratory volume in one second; FVC: forced expiratory vital capacity; GI: global inhomogeneity; IVC: inspiratory vital capacity;  $MEF_{25}$ : maximum expiratory flow at 25% of FVC;  $MEF_{75}$ : maximum expiratory flow at 75% of FVC; PEEP: positive end-expiratory pressure, PEF: peak expiratory flow; R/L: right-to-left;  $V_T$ : tidal volume

## Recommendations for future direction

As documented by the findings of a large number of EIT studies summarized in the Tables E7.1-E7.3, EIT can generate information on regional lung ventilation and lung function that is in part unique or not easily accessible by other medical technology and from which the examined patients might benefit. This multitude of EIT results, however, does not yet allow the conclusion that EIT is already fully ready for the routine clinical use.

The current degree of knowledge implies that the routine use of EIT is most probable in the personalized bedside guidance of ventilator therapy. Prospective clinical trials are urgently needed to confirm the ability of EIT to reliably guide mechanical ventilation in comparison with the current standard clinical practice. Based on these studies, consensus algorithms for adjustment of ventilator settings should be developed based on selected EIT measures in combination with the findings of other medical diagnostic and monitoring methods. An automated generation of relevant EIT findings with easy accessibility for immediate use by the clinical staff with alerts in the case of potentially adverse situations is essential. Large multicenter outcome EIT studies should then follow. An implementation of EIT monitoring into the standard ICU monitoring would be desirable.

The use of chest EIT in cardiovascular monitoring and regional pulmonary function testing is less advanced. It still requires validation studies, for instance regarding the aspired long-term monitoring of patients with chronic lung diseases where the proof of the correlation between the disease severity and EIT findings is lacking. Methodological advances are also needed, for instance allowing reliable EIT data acquisitions and analysis under the more challenging conditions of spontaneous breathing in typically upright and partially moving patients. The subsequent steps necessary for establishing EIT in these additional clinical fields (i.e. the prospective mono- and multicenter studies mentioned above) resemble the proposed steps needed in establishing EIT for optimization of ventilator therapy.

The clinical use and acceptance of EIT would certainly benefit from further technological advances. Wearable EIT would largely increase its applicability and potentially allow home monitoring especially in pulmonology patients. EIT image reconstruction taking individual a priori anatomical information (which often is available in patients) into account might improve not only the EIT image quality but also increase the information content of EIT chest examinations. The research in these areas is ongoing and it could foster the clinical use of EIT even in not yet identified new application fields.

**Document preparation**

The first draft of this online document was prepared by M. Bodenstein with collaboration of L. Camporota, I. Frerichs, F. Suarez-Sipman, E. Fan and N. Weiler. It was reviewed and approved by all other authors and collaborators.

## References

1. Meier T, Luepschen H, Karsten J, Leibecke T, Grossherr M, Gehring H, Leonhardt S. Assessment of regional lung recruitment and derecruitment during a PEEP trial based on electrical impedance tomography. *Intensive Care Med* 2008;34:543-550.
2. Lowhagen K, Lindgren S, Odenstedt H, Stenqvist O, Lundin S. A new non-radiological method to assess potential lung recruitability: A pilot study in ALI patients. *Acta Anaesthesiol Scand* 2011;55:165-174.
3. Kunst PW, de Vries PM, Postmus PE, Bakker J. Evaluation of electrical impedance tomography in the measurement of PEEP-induced changes in lung volume. *Chest* 1999;115:1102-1106.
4. Mauri T, Bellani G, Confalonieri A, Tagliabue P, Turella M, Coppadoro A, Citerio G, Patroniti N, Pesenti A. Topographic distribution of tidal ventilation in acute respiratory distress syndrome: Effects of positive end-expiratory pressure and pressure support. *Crit Care Med* 2013;41:1664-1673.
5. Cinnella G, Grasso S, Raimondo P, D'Antini D, Mirabella L, Rausedo M, Dambrosio M. Physiological effects of the open lung approach in patients with early, mild, diffuse acute respiratory distress syndrome: An electrical impedance tomography study. *Anesthesiology* 2015;123:1113-1121.
6. Blankman P, SM VDK, Gommers D. Tidal ventilation distribution during pressure-controlled ventilation and pressure support ventilation in post-cardiac surgery patients. *Acta Anaesthesiol Scand* 2014;58:997-1006.
7. Frerichs I, Hahn G, Golisch W, Kurpitz M, Burchardi H, Hellige G. Monitoring perioperative changes in distribution of pulmonary ventilation by functional electrical impedance tomography. *Acta Anaesthesiol Scand* 1998;42:721-726.
8. Luepschen H, Meier T, Grossherr M, Leibecke T, Karsten J, Leonhardt S. Protective ventilation using electrical impedance tomography. *Physiol Meas* 2007;28:S247-260.
9. Frerichs I, Dargaville PA, van Genderingen H, Morel DR, Rimensberger PC. Lung volume recruitment after surfactant administration modifies spatial distribution of ventilation. *Am J Respir Crit Care Med* 2006;174:772-779.
10. Zick G, Elke G, Becher T, Schadler D, Pulletz S, Freitag-Wolf S, Weiler N, Frerichs I. Effect of PEEP and tidal volume on ventilation distribution and end-expiratory lung volume: A prospective experimental animal and pilot clinical study. *PLoS One* 2013;8:e72675.
11. Wolf GK, Gomez-Laberge C, Rettig JS, Vargas SO, Smallwood CD, Prabhu SP, Vitali SH, Zurakowski D, Arnold JH. Mechanical ventilation guided by electrical impedance tomography in experimental acute lung injury. *Crit Care Med* 2013;41:1296-1304.

12. Dargaville PA, Rimensberger PC, Frerichs I. Regional tidal ventilation and compliance during a stepwise vital capacity manoeuvre. *Intensive Care Med* 2010;36:1953-1961.
13. Lowhagen K, Lundin S, Stenqvist O. Regional intratidal gas distribution in acute lung injury and acute respiratory distress syndrome-assessed by electric impedance tomography. *Minerva Anesthesiol* 2010;76:1024-1035.
14. Blankman P, Hasan D, Groot Jebbink E, Gommers D. Detection of 'best' positive end-expiratory pressure derived from electrical impedance tomography parameters during a decremental positive end-expiratory pressure trial. *Crit Care* 2014;18:R95.
15. Pulletz S, Adler A, Kott M, Elke G, Gawelczyk B, Schadler D, Zick G, Weiler N, Frerichs I. Regional lung opening and closing pressures in patients with acute lung injury. *J Crit Care* 2012;27:323 e311-328.
16. Zhao Z, Frerichs I, Pulletz S, Muller-Lisse U, Moller K. The influence of image reconstruction algorithms on linear thorax EIT image analysis of ventilation. *Physiol Meas* 2014;35:1083-1093.
17. Wrigge H, Zinserling J, Muders T, Varelmann D, Gunther U, von der Groeben C, Magnusson A, Hedenstierna G, Putensen C. Electrical impedance tomography compared with thoracic computed tomography during a slow inflation maneuver in experimental models of lung injury. *Crit Care Med* 2008;36:903-909.
18. Muders T, Luepschen H, Zinserling J, Greschus S, Fimmers R, Guenther U, Buchwald M, Grigutsch D, Leonhardt S, Putensen C, Wrigge H. Tidal recruitment assessed by electrical impedance tomography and computed tomography in a porcine model of lung injury. *Crit Care Med* 2012;40:903-911.
19. Hinz J, Hahn G, Neumann P, Sydow M, Mohrenweiser P, Hellige G, Burchardi H. End-expiratory lung impedance change enables bedside monitoring of end-expiratory lung volume change. *Intensive Care Med* 2003;29:37-43.
20. Bikker IG, Preis C, Egal M, Bakker J, Gommers D. Electrical impedance tomography measured at two thoracic levels can visualize the ventilation distribution changes at the bedside during a decremental positive end-expiratory lung pressure trial. *Crit Care* 2011;15:R193.
21. Erlandsson K, Odenstedt H, Lundin S, Stenqvist O. Positive end-expiratory pressure optimization using electric impedance tomography in morbidly obese patients during laparoscopic gastric bypass surgery. *Acta Anaesthesiol Scand* 2006;50:833-839.
22. Karsten J, Grusnick C, Paarmann H, Heringlake M, Heinze H. Positive end-expiratory pressure titration at bedside using electrical impedance tomography in post-operative cardiac surgery patients. *Acta Anaesthesiol Scand* 2015;59:723-732.

23. Frerichs I, Dargaville PA, Dudykevych T, Rimensberger PC. Electrical impedance tomography: A method for monitoring regional lung aeration and tidal volume distribution? *Intensive Care Med* 2003;29:2312-2316.
24. Zhao Z, Pulletz S, Frerichs I, Muller-Lisse U, Moller K. The EIT-based global inhomogeneity index is highly correlated with regional lung opening in patients with acute respiratory distress syndrome. *BMC Res Notes* 2014;7:82.
25. Becher T, Kott M, Schadler D, Vogt B, Meinel T, Weiler N, Frerichs I. Influence of tidal volume on ventilation inhomogeneity assessed by electrical impedance tomography during controlled mechanical ventilation. *Physiol Meas* 2015;36:1137-1146.
26. Costa EL, Borges JB, Melo A, Suarez-Sipmann F, Toufen C, Jr., Bohm SH, Amato MB. Bedside estimation of recruitable alveolar collapse and hyperdistension by electrical impedance tomography. *Intensive Care Med* 2009;35:1132-1137.
27. Zhao Z, Moller K, Steinmann D, Frerichs I, Guttman J. Evaluation of an electrical impedance tomography-based global inhomogeneity index for pulmonary ventilation distribution. *Intensive Care Med* 2009;35:1900-1906.
28. Zhao Z, Steinmann D, Frerichs I, Guttman J, Moller K. PEEP titration guided by ventilation homogeneity: A feasibility study using electrical impedance tomography. *Crit Care* 2010;14:R8.
29. Schaefer MS, Wania V, Bastin B, Schmalz U, Kienbaum P, Beiderlinden M, Treschan TA. Electrical impedance tomography during major open upper abdominal surgery: A pilot-study. *BMC Anesthesiol* 2014;14:51.
30. Heinze H, Eichler W, Karsten J, Sedemund-Adib B, Heringlake M, Meier T. Functional residual capacity-guided alveolar recruitment strategy after endotracheal suctioning in cardiac surgery patients. *Crit Care Med* 2011;39:1042-1049.
31. Radke OC, Schneider T, Heller AR, Koch T. Spontaneous breathing during general anesthesia prevents the ventral redistribution of ventilation as detected by electrical impedance tomography: A randomized trial. *Anesthesiology* 2012;116:1227-1234.
32. Karsten J, Luepschen H, Grossherr M, Bruch HP, Leonhardt S, Gehring H, Meier T. Effect of PEEP on regional ventilation during laparoscopic surgery monitored by electrical impedance tomography. *Acta Anaesthesiol Scand* 2011;55:878-886.
33. Camporota L, Smith J, Barrett N, Beale R. Assessment of regional lung mechanics with electrical impedance tomography can determine the requirement for ECMO in patients with severe ARDS. *Intensive Care Med* 2012;38:2086-2087.
34. Vogt B, Pulletz S, Elke G, Zhao Z, Zabel P, Weiler N, Frerichs I. Spatial and temporal heterogeneity of regional lung ventilation determined by electrical impedance tomography during pulmonary function testing. *J Appl Physiol* 2012;113:1154-1161.

35. Frerichs I, Zhao Z, Becher T, Zabel P, Weiler N, Vogt B. Regional lung function determined by electrical impedance tomography during bronchodilator reversibility testing in patients with asthma. *Physiol Meas* 2016; 37: 698-712.
36. Zhao Z, Fischer R, Frerichs I, Muller-Lisse U, Moller K. Regional ventilation in cystic fibrosis measured by electrical impedance tomography. *J Cyst Fibros* 2012;11:412-418.
37. Blankman P, Hasan D, van Mourik MS, Gommers D. Ventilation distribution measured with EIT at varying levels of pressure support and neurally adjusted ventilatory assist in patients with ALI. *Intensive Care Med* 2013;39:1057-1062.
38. van Genderingen HR, van Vught AJ, Jansen JR. Regional lung volume during high-frequency oscillatory ventilation by electrical impedance tomography. *Crit Care Med* 2004;32:787-794.
39. Frerichs I, Achtzehn U, Pechmann A, Pulletz S, Schmidt EW, Quintel M, Weiler N. High-frequency oscillatory ventilation in patients with acute exacerbation of chronic obstructive pulmonary disease. *J Crit Care* 2012;27:172-181.
40. Frerichs I, Pulletz S, Elke G, Gawelczyk B, Frerichs A, Weiler N. Patient examinations using electrical impedance tomography-sources of interference in the intensive care unit. *Physiol Meas* 2011;32:L1-L10.
41. Wolf GK, Grychtol B, Boyd TK, Zurakowski D, Arnold JH. Regional overdistension identified with electrical impedance tomography in the perflubron-treated lung. *Physiol Meas* 2010;31:S85-95.
42. Victorino JA, Borges JB, Okamoto VN, Matos GF, Tucci MR, Carames MP, Tanaka H, Sipmann FS, Santos DC, Barbas CS, Carvalho CR, Amato MB. Imbalances in regional lung ventilation: A validation study on electrical impedance tomography. *Am J Respir Crit Care Med* 2004;169:791-800.
43. Frerichs I, Dargaville PA, Rimensberger PC. Regional respiratory inflation and deflation pressure-volume curves determined by electrical impedance tomography. *Physiol Meas* 2013;34:567-577.
44. Hinz J, Moerer O, Neumann P, Dudykevych T, Frerichs I, Hellige G, Quintel M. Regional pulmonary pressure volume curves in mechanically ventilated patients with acute respiratory failure measured by electrical impedance tomography. *Acta Anaesthesiol Scand* 2006;50:331-339.
45. Kunst PW, Bohm SH, Vazquez de Anda G, Amato MB, Lachmann B, Postmus PE, de Vries PM. Regional pressure volume curves by electrical impedance tomography in a model of acute lung injury. *Crit Care Med* 2000;28:178-183.
46. Grychtol B, Wolf GK, Arnold JH. Differences in regional pulmonary pressure-impedance curves before and after lung injury assessed with a novel algorithm. *Physiol Meas* 2009;30:S137-148.



47. Mauri T, Eronia N, Abbruzzese C, Marcolin R, Coppadoro A, Spadaro S, Patroniti N, Bellani G, Pesenti A. Effects of sigh on regional lung strain and ventilation heterogeneity in acute respiratory failure patients undergoing assisted mechanical ventilation. *Crit Care Med* 2015;43:1823-1831.
48. Zhao Z, Muller-Lisse U, Frerichs I, Fischer R, Moller K. Regional airway obstruction in cystic fibrosis determined by electrical impedance tomography in comparison with high resolution CT. *Physiol Meas* 2013;34:N107-114.
49. Bodenstein M, Boehme S, Bierschock S, Vogt A, David M, Markstaller K. Determination of respiratory gas flow by electrical impedance tomography in an animal model of mechanical ventilation. *BMC Pulm Med* 2014;14:73.
50. Gomez-Laberge C, Rettig JS, Smallwood CD, Boyd TK, Arnold JH, Wolf GK. Interaction of dependent and non-dependent regions of the acutely injured lung during a stepwise recruitment manoeuvre. *Physiol Meas* 2013;34:163-177.
51. Pulletz S, Elke G, Zick G, Schadler D, Scholz J, Weiler N, Frerichs I. Performance of electrical impedance tomography in detecting regional tidal volumes during one-lung ventilation. *Acta Anaesthesiol Scand* 2008;52:1131-1139.
52. Steinmann D, Stahl CA, Minner J, Schumann S, Loop T, Kirschbaum A, Priebe HJ, Guttman J. Electrical impedance tomography to confirm correct placement of double-lumen tube: A feasibility study. *Br J Anaesth* 2008;101:411-418.
53. Reinius H, Borges JB, Freden F, Jideus L, Camargo ED, Amato MB, Hedenstierna G, Larsson A, Lennmyr F. Real-time ventilation and perfusion distributions by electrical impedance tomography during one-lung ventilation with capnothorax. *Acta Anaesthesiol Scand* 2015;59:354-368.
54. Bodenstein M, Boehme S, Wang H, Duenges B, Markstaller K. Hints for cyclical recruitment of atelectasis during ongoing mechanical ventilation in lavage and oleic acid lung injury detected by SpO<sub>2</sub> oscillations and electrical impedance tomography. *Exp Lung Res* 2014;40:427-438.
55. Kunst PW, Vazquez de Anda G, Bohm SH, Faes TJ, Lachmann B, Postmus PE, de Vries PM. Monitoring of recruitment and derecruitment by electrical impedance tomography in a model of acute lung injury. *Crit Care Med* 2000;28:3891-3895.
56. Gomez-Laberge C, Arnold JH, Wolf GK. A unified approach for EIT imaging of regional overdistension and atelectasis in acute lung injury. *IEEE Trans Med Imaging* 2012;31:834-842.
57. Eyuboglu BM, Brown BH, Barber DC, Seagar AD. Localisation of cardiac related impedance changes in the thorax. *Clin Phys Physiol Meas* 1987;8 Suppl A:167-173.

58. McArdle FJ, Suggett AJ, Brown BH, Barber DC. An assessment of dynamic images by applied potential tomography for monitoring pulmonary perfusion. *Clin Phys Physiol Meas* 1988;9 Suppl A:87-91.
59. Fagerberg A, Stenqvist O, Aneman A. Monitoring pulmonary perfusion by electrical impedance tomography: An evaluation in a pig model. *Acta Anaesthesiol Scand* 2009;53:152-158.
60. Frerichs I, Pulletz S, Elke G, Reifferscheid F, Schadler D, Scholz J, Weiler N. Assessment of changes in distribution of lung perfusion by electrical impedance tomography. *Respiration* 2009;77:282-291.
61. Smit HJ, Vonk Noordegraaf A, Marcus JT, Boonstra A, de Vries PM, Postmus PE. Determinants of pulmonary perfusion measured by electrical impedance tomography. *Eur J Appl Physiol* 2004;92:45-49.
62. Frerichs I, Hinz J, Herrmann P, Weisser G, Hahn G, Quintel M, Hellige G. Regional lung perfusion as determined by electrical impedance tomography in comparison with electron beam CT imaging. *IEEE Trans Med Imaging* 2002;21:646-652.
63. Borges JB, Suarez-Sipmann F, Bohm SH, Tusman G, Melo A, Maripuu E, Sandstrom M, Park M, Costa EL, Hedenstierna G, Amato M. Regional lung perfusion estimated by electrical impedance tomography in a piglet model of lung collapse. *J Appl Physiol* 2012;112:225-236.
64. Elke G, Pulletz S, Schadler D, Zick G, Gawelczyk B, Frerichs I, Weiler N. Measurement of regional pulmonary oxygen uptake - a novel approach using electrical impedance tomography. *Physiol Meas* 2011;32:877-886.
65. Zadehkoochak M, Blott BH, Hames TK, George RF. Pulmonary perfusion and ventricular ejection imaging by frequency domain filtering of EIT (electrical impedance tomography) images. *Clin Phys Physiol Meas* 1992;13 Suppl A:191-196.
66. Smit HJ, Vonk-Noordegraaf A, Boonstra A, de Vries PM, Postmus PE. Assessment of the pulmonary volume pulse in idiopathic pulmonary arterial hypertension by means of electrical impedance tomography. *Respiration* 2006;73:597-602.
67. Smit HJ, Vonk Noordegraaf A, Roeleveld RJ, Bronzwaer JG, Postmus PE, de Vries PM, Boonstra A. Epoprostenol-induced pulmonary vasodilatation in patients with pulmonary hypertension measured by electrical impedance tomography. *Physiol Meas* 2002;23:237-243.
68. Li Y, Tesselaar E, Borges JB, Bohm SH, Sjoberg F, Janerot-Sjoberg B. Hyperoxia affects the regional pulmonary ventilation/perfusion ratio: An electrical impedance tomography study. *Acta Anaesthesiol Scand* 2014;58:716-725.

69. Fagerberg A, Sondergaard S, Karason S, Aneman A. Electrical impedance tomography and heterogeneity of pulmonary perfusion and ventilation in porcine acute lung injury. *Acta Anaesthesiol Scand* 2009;53:1300-1309.
70. Fagerberg A, Stenqvist O, Aneman A. Electrical impedance tomography applied to assess matching of pulmonary ventilation and perfusion in a porcine experimental model. *Crit Care* 2009;13:R34.
71. Eyuboglu BM, Brown BH, Barber DC. In vivo imaging of cardiac related impedance changes. *IEEE Eng Med Biol Mag* 1989;8:39-45.
72. Vonk Noordegraaf A, Faes TJ, Marcus JT, Janse A, Heethaar RM, Postmus PE, de Vries PM. Improvement of cardiac imaging in electrical impedance tomography by means of a new electrode configuration. *Physiol Meas* 1996;17:179-188.
73. Vonk-Noordegraaf A, 2nd, Janse A, Marcus JT, Bronzwaer JG, Postmust PE, Faes TJ, De Vries PM. Determination of stroke volume by means of electrical impedance tomography. *Physiol Meas* 2000;21:285-293.
74. Pikkemaat R, Lundin S, Stenqvist O, Hilgers RD, Leonhardt S. Recent advances in and limitations of cardiac output monitoring by means of electrical impedance tomography. *Anesth Analg* 2014;119:76-83.
75. Vonk Noordegraaf A, Faes TJ, Janse A, Marcus JT, Bronzwaer JG, Postmus PE, de Vries PM. Noninvasive assessment of right ventricular diastolic function by electrical impedance tomography. *Chest* 1997;111:1222-1228.
76. Maisch S, Bohm SH, Sola J, Goepfert MS, Kubitz JC, Richter HP, Ridder J, Goetz AE, Reuter DA. Heart-lung interactions measured by electrical impedance tomography. *Crit Care Med* 2011;39:2173-2176.
77. Kunst PW, Vonk Noordegraaf A, Raaijmakers E, Bakker J, Groeneveld AB, Postmus PE, de Vries PM. Electrical impedance tomography in the assessment of extravascular lung water in noncardiogenic acute respiratory failure. *Chest* 1999;116:1695-1702.
78. Bodenstein M, Wang H, Boehme S, Vogt A, Kwiecien R, David M, Markstaller K. Influence of crystalloid and colloid fluid infusion and blood withdrawal on pulmonary bioimpedance in an animal model of mechanical ventilation. *Physiol Meas* 2012;33:1225-1236.
79. Noble TJ, Harris ND, Morice AH, Milnes P, Brown BH. Diuretic induced change in lung water assessed by electrical impedance tomography. *Physiol Meas* 2000;21:155-163.
80. Noble TJ, Morice AH, Channer KS, Milnes P, Harris ND, Brown BH. Monitoring patients with left ventricular failure by electrical impedance tomography. *Eur J Heart Fail* 1999;1:379-384.
81. Mason NP, Petersen M, Melot C, Imanow B, Matveykine O, Gautier MT, Sarybaev A, Aldashev A, Mirrakhimov MM, Brown BH, Leathard AD, Naeije R. Serial changes in nasal

potential difference and lung electrical impedance tomography at high altitude. *J Appl Physiol* 2003;94:2043-2050.

82. Brown BH, Flewelling R, Griffiths H, Harris ND, Leathard AD, Lu L, Morice AH, Neufeld GR, Nopp P, Wang W. EITS changes following oleic acid induced lung water. *Physiol Meas* 1996;17 Suppl 4A:A117-130.

83. Hahn G, Just A, Dudykevych T, Frerichs I, Hinz J, Quintel M, Hellige G. Imaging pathologic pulmonary air and fluid accumulation by functional and absolute EIT. *Physiol Meas* 2006;27:S187-198.

84. Trepte CJ, Phillips CR, Sola J, Adler A, Haas SA, Rapin M, Bohm SH, Reuter DA. Electrical impedance tomography (EIT) for quantification of pulmonary edema in acute lung injury. *Crit Care* 2016;20:18.

85. Blaser D, Pulletz S, Becher T, Schadler D, Elke G, Weiler N, Frerichs I. Unilateral empyema impacts the assessment of regional lung ventilation by electrical impedance tomography. *Physiol Meas* 2014;35:975-983.

86. Campbell JH, Harris ND, Zhang F, Brown BH, Morice AH. Clinical applications of electrical impedance tomography in the monitoring of changes in intrathoracic fluid volumes. *Physiol Meas* 1994;15 Suppl 2a:A217-222.

87. Alves SH, Amato MB, Terra RM, Vargas FS, Caruso P. Lung reaeration and reventilation after aspiration of pleural effusions. A study using electrical impedance tomography. *Ann Am Thorac Soc* 2014;11:186-191.

88. Costa EL, Chaves CN, Gomes S, Beraldo MA, Volpe MS, Tucci MR, Schettino IA, Bohm SH, Carvalho CR, Tanaka H, Lima RG, Amato MB. Real-time detection of pneumothorax using electrical impedance tomography. *Crit Care Med* 2008;36:1230-1238.

89. Preis C, Luepschen H, Leonhardt S, Gommers D. Experimental case report: Development of a pneumothorax monitored by electrical impedance tomography. *Clin Physiol Funct Imaging* 2009;29:159-162.

90. Frerichs I, Golisch W, Hahn G, Kurpitz M, Burchardi H, Hellige G. Heterogeneous distribution of pulmonary ventilation in intensive care patients detected by functional electrical impedance tomography. *J Intensive Care Med* 1998;13:168-173.

91. Karsten J, Krabbe K, Heinze H, Dalhoff K, Meier T, Dromann D. Bedside monitoring of ventilation distribution and alveolar inflammation in community-acquired pneumonia. *J Clin Monit Comput* 2014;28:403-408.

92. Serrano RE, de LB, Casas O, Feixas T, Calaf N, Camacho V, Carrio I, Casan P, Sanchis J, Riu PJ. Use of electrical impedance tomography (EIT) for the assessment of unilateral pulmonary function. *Physiol Meas* 2002;23:211-220.

93. Serrano RE, Riu PJ, de Lema B, Casan P. Assessment of the unilateral pulmonary function by means of electrical impedance tomography using a reduced electrode set. *Physiol Meas* 2004;25:803-813.
94. Kunst PW, Vonk Noordegraaf A, Hoekstra OS, Postmus PE, de Vries PM. Ventilation and perfusion imaging by electrical impedance tomography: A comparison with radionuclide scanning. *Physiol Meas* 1998;19:481-490.
95. Eyuboglu BM, Oner AF, Baysal U, Biber C, Keyf AI, Yilmaz U, Erdogan Y. Application of electrical impedance tomography in diagnosis of emphysema--a clinical study. *Physiol Meas* 1995;16:A191-211.
96. Balleza M, Calaf N, Feixas T, Gonzalez M, Anton D, Riu PJ, Casan P. Measuring breathing pattern in patients with chronic obstructive pulmonary disease by electrical impedance tomography. *Arch Bronconeumol* 2009;45:320-324.
97. Vogt B, Zhao Z, Zabel P, Weiler N, Frerichs I. Regional lung response to bronchodilator reversibility testing determined by electrical impedance tomography in chronic obstructive pulmonary disease. *Am J Physiol Lung Cell Mol Physiol* 2016;311:L8-L19.
98. Mauri T, Bellani G, Salerno D, Mantegazza F, Pesenti A. Regional distribution of air trapping in chronic obstructive pulmonary disease. *Am J Respir Crit Care Med* 2013;188:1466-1467.
99. Wettstein M, Radlinger L, Riedel T. Effect of different breathing aids on ventilation distribution in adults with cystic fibrosis. *PLoS One* 2014;9:e106591.
100. Dias OM, Costa EL, Pereira DA, Chaves CN, Rached SZ, Barbas CS. Tracheobronchomalacia in a patient on invasive mechanical ventilation: The role of electrical impedance tomography in its detection and positive end-expiratory pressure titration. *J Bras Pneumol* 2015;41:203-205.
101. Dostal P, Truhlar A, Polak J, Sedlak V, Turek Z. Assessment of regional ventilation with the electrical impedance tomography in a patient after asphyxial cardiac arrest. *Resuscitation* 2014;85:e115-117.
102. Guerin C, Frerichs I. Getting a better picture of the correlation between lung function and structure using electrical impedance tomography. *Am J Respir Crit Care Med* 2014;190:1186-1187.
